# Supplementary material for: Development and Validation of a Quantitative, High-Throughput, Fluorescent-Based Bioassay to Detect Schistosoma Viability
Source: PLoS Negl Trop Dis. 2010 Jul 27;4(7):e759. doi: 10.1371/journal.pntd.0000759 (PMC2910722; doi:10.1371/journal.pntd.0000759)
Supplement: Dataset S1 — Further description of selected compounds used in the dual-fluorescent helminth viability assay. (0.01 MB XLS) [file pntd.0000759.s001.xls]

## Sheet: Sheet1
Supplementary Table 1: Description of compounds used in the dual-fluorescent helminth viability assay
Compound	Solvent	Uses	Published phenotype
gambogic acid	ethanol	apoptosis inducer	death
salinomycin, sodium	ethanol	antibacterial	death
ethinyl estradiol	water	artificial estrogen	overactive
fluoxetine hydrochloride	ethanol	antidepressant	overactive
miconazole nitrate	water	antifungal	rounded
chlorpromazine hydrochloride	water	antipsychotic	overactive
amphotericin b	ethanol	antifungal	death
niclosamide	ethanol	antihelmintic	death
praziquantel	ethanol	anthelmintic	rounded
bepridil	water	angina treatment	none
ciclopirox	acetone	antifungal	none
rescinnamine	acetonitrile	antihypertensive	none
flucytosine	water	antifungal	none
vinblastine	acetone	antimitotic cancer drug	none
carbidopa	methanol	parkinson's disease drug	none
Published phenotypes taken from Abdulla et al [10]
Those with no published phenotype taken from Berriman et al [3]
All compounds were solublized in the described solvent at 1mM stock concentrations and stored at -80°C
